# Supplementary material
Source: ML conference proceedings conference paper supplement (https://openaccess.thecvf.com/content/CVPR2023/html/Sosea_MarginMatch_Improving_Semi-Supervised_CVPR_2023_paper.html)
Supplement: Supplementary file 1 [file Sosea_MarginMatch_Improving_Semi-Supervised_CVPR_2023_supplemental.zip]

Archive with 1 entries (1 files):
- appendix.pdf
